# Supplementary material
Source: HighWire-hosted journal article supplement (https://bmjpaedsopen.bmj.com/content/5/1/e001052)
Supplement: inline-supplementary-material-1 [file inline-supplementary-material-1.pdf]

## Appendix I

Interview questions family history Blount disease:

1. Date of interview: .....
  2. Present at the interview: PATIENT / FATHER / MOTHER /  
OTHERS:.....
  3. Name patient: ..... M / F
  4. Telephone number: .....
  5. Date of birth patient: .....
  6. Patient number: .....
  7. Address patient: .....
  8. Region of birth: .....
  9. Ethnic group: .....
  10. Age started bowing legs: .....
- EARLY ONSET / JUVENILE ONSET / ADOLESCENT ONSET
11. Leg(s) affected: .....
  12. History of Blount disease/bowed legs father: YES / NO
  13. History of Blount disease/bowed legs mother: YES / NO
  14. History of Blount disease/bowed legs siblings: YES / NO
  15. History of Blount disease/bowed legs other family members: YES / NO
  16. If yes answered on questions 12-15:
    - a. What was the age of diagnosis?
    - b. Where was it diagnosed?
    - c. Did he or she received an operation?
    - d. Did it resolve by itself? If yes, at what age?

- 17. Any older or younger siblings? .....
- 18. Age of mother at birth of patient? .....
- 19. Any further comments: (Possible to take blood from both parents and child?)  
.....
